# Supplementary material for: Virus-derived peptide inhibitors of the herpes simplex virus type 1 nuclear egress complex
Source: bioRxiv or medRxiv preprint supplement (doi:10.1101/2020.06.24.168898), 2021-02-01
Supplement: Supplementary file [file media-1.pdf]

## Supporting Information

### **Virus-derived peptide inhibitors of the herpes simplex virus type 1 nuclear egress complex**

*Elizabeth B. Draganova<sup>1</sup> and Ekaterina E. Heldwein<sup>1,\*</sup>*

<sup>1</sup>Department of Molecular Biology and Microbiology, Tufts University School of Medicine,  
Boston, MA, 02111, USA

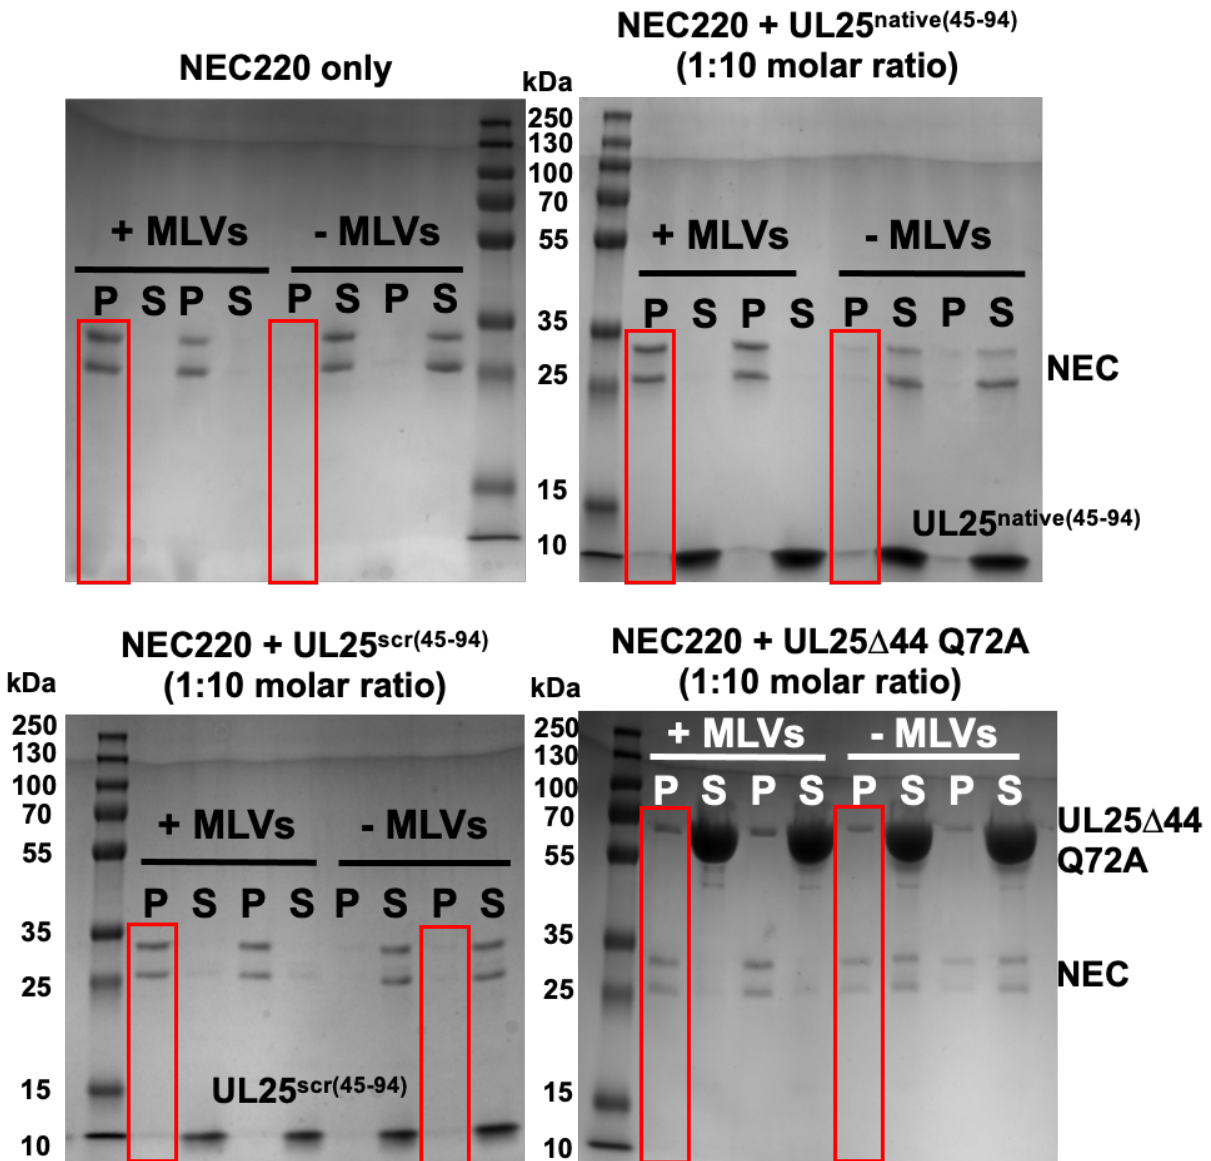

**Supplementary Fig. S1. Original SDS-PAGE images of the co-sedimentation assay samples shown in Figure 5.** Each gel represents one biological replicate used to generate the bar graph in Figure 5. All samples were run in parallel. Red boxes denote the gel lanes shown in the main figure. Gels were stained with Coomassie G-250. Gels were imaged together using a Syngene G:BOX. Both the pellet (P) and supernatant (S) samples, either in the presence (+MLVs) or absence (-MLVs) of MLVs are shown on the gel.

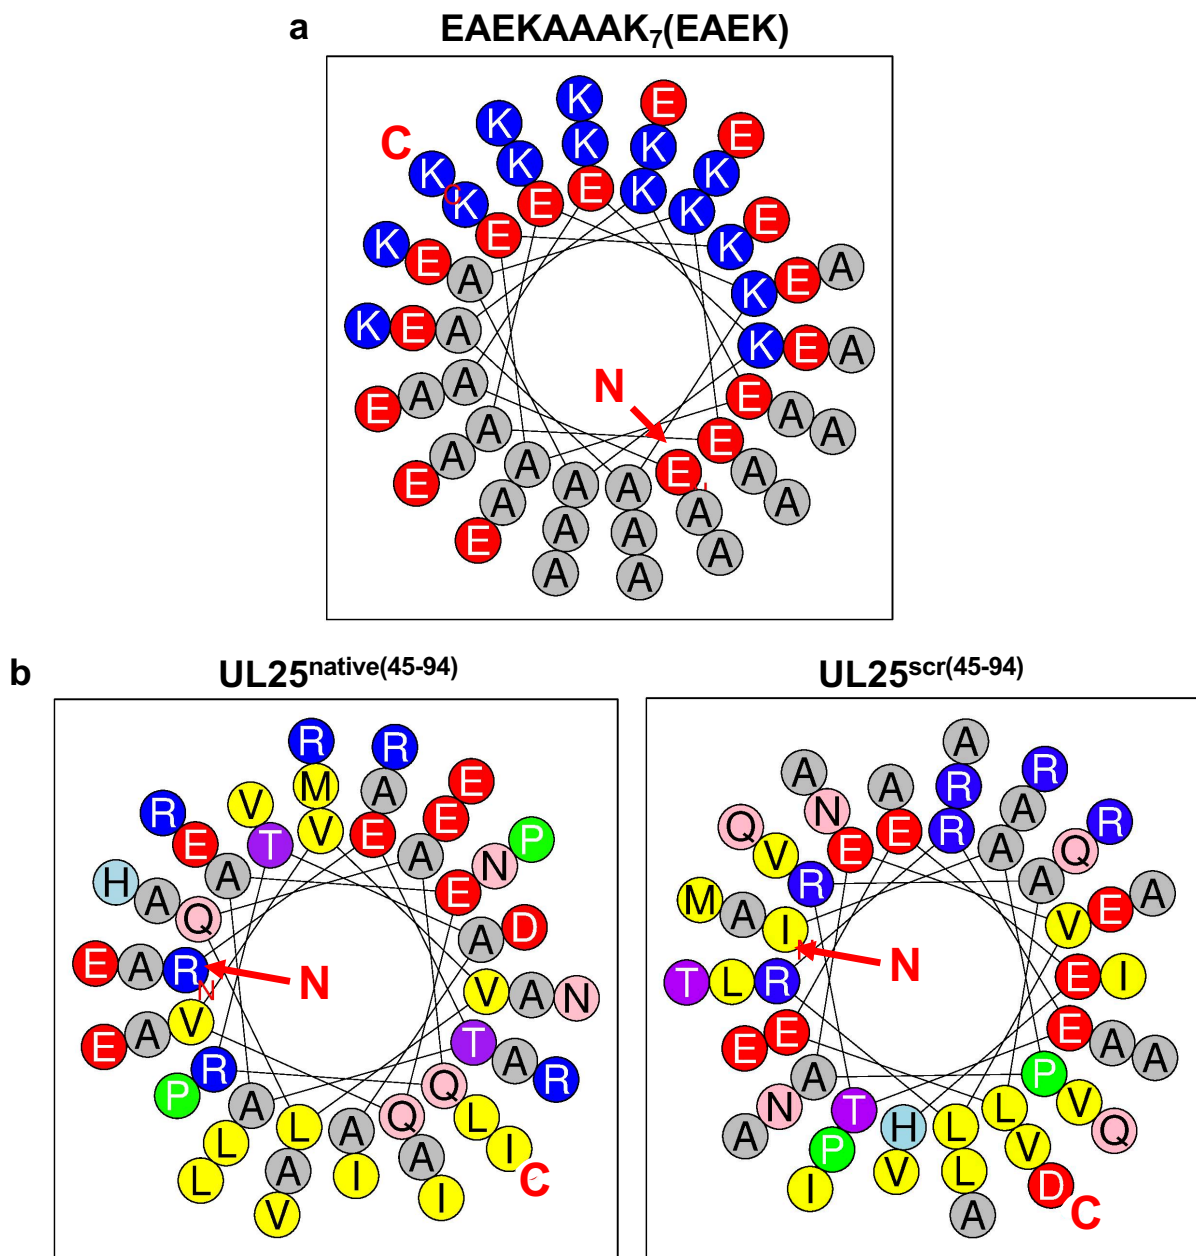

**Supplementary Fig. S2. Helical wheel projections of the (EAEKAAAK)<sub>7</sub>EAEK, UL25<sup>native(45-94)</sup> and UL25<sup>scr(45-94)</sup> peptides.** **a)** The (EAEKAAAK)<sub>7</sub>EAEK peptide is amphipathic as shown by the distribution of charged (blue and red) residues on one face of the helix versus the hydrophobic alanine residues (grey) on the other. **b)** The UL25<sup>native(45-94)</sup> and UL25<sup>scr(45-94)</sup> peptides are less amphipathic as indicated by the less even distribution of charged (blue and red) and polar residues (pink, light blue, and purple) versus hydrophobic (grey and yellow) residues. The N and C on each wheel indicate the N and the C termini. Wheel projections were made using Heliquest<sup>1</sup>.

**Supplementary Table S1. Secondary structure content (%) estimation of peptides.** Spectral deconvolution using DichroWeb<sup>2</sup> was performed on samples in the absence or presence of 30% trifluoroethanol (TFE). Spectra were deconvoluted using the CONTINLL analysis program<sup>3</sup>. Data from reference datasets 4, 7 and SMP180 were averaged to obtain secondary structure estimates<sup>4</sup>.

| Peptide                             | No TFE          |                |             | 30% TFE         |                |             |
|-------------------------------------|-----------------|----------------|-------------|-----------------|----------------|-------------|
|                                     | $\alpha$ -Helix | $\beta$ -sheet | Random coil | $\alpha$ -Helix | $\beta$ -sheet | Random coil |
|                                     | %               |                |             |                 |                |             |
| <b>UL25<sup>native(45-94)</sup></b> | 12              | 12             | 76          | 37              | 12             | 51          |
| <b>UL25<sup>scr(45-94)</sup></b>    | 8               | 26             | 66          | 31              | 16             | 53          |
| <b>UL25<sup>74-94</sup></b>         | 7               | 35             | 58          | 7               | 35             | 58          |
| <b>gB<sup>103-152</sup></b>         | 8               | 26             | 66          | 13              | 24             | 63          |
| <b>(EAEKAAK)<sub>7</sub>EAEK</b>    | 63              | 3              | 29          | 75              | 2              | 23          |

**Supplementary Table S2. List of primers and gBlock sequence used for cloning procedures described in Materials and Methods.** All primers are listed in the 5'-3' direction. Restriction sites are underlined and mutations are bolded.

| Primer Name                                         | Primer Sequence (5'-3')                                                                                                                                                                                                                                                               | Restriction Site |
|-----------------------------------------------------|---------------------------------------------------------------------------------------------------------------------------------------------------------------------------------------------------------------------------------------------------------------------------------------|------------------|
| UL25 rev (JB134)                                    | aaaaa <u>actcgag</u> ttattacactgcgctcagatactgagg                                                                                                                                                                                                                                      | XhoI             |
| UL25Δ44 Q72A (ED06)                                 | aatgcagcaatg <b>gcg</b> gcagcc                                                                                                                                                                                                                                                        | Site-directed    |
| UL25Δ44 Q72A (ED07)                                 | ggctg <b>ccg</b> cattgctgcatt                                                                                                                                                                                                                                                         | Site-directed    |
| (EAEKAAK) <sub>7</sub> EAEK peptide gBlock sequence | aaaaaa <u>ggatcc</u> gaa gcg gaa aaa gcg gcg aaa gaa gcg gaa<br>aaa gcg gcg aaa gaa gcg gaa aaa gaa gcg gaa aaa gcg<br>gcg aaa gaa gcg gaa aaa gcg gcg aaa gaa gcg gaa aaa<br>gaa gcg gaa aaa gcg gcg aaa gaa gcg gaa aaa gcg gcg<br>aaa gaa gcg gaa aaa taa taa <u>ctcgag</u> aaaaaa | BamHI/XhoI       |

**Supplementary Table 3. Raw data and background values collected for each reported GUV budding assay.** The reported biological replicate average values (%) are the points presented in Figure 2.

| Biological Replicate | Technical Replicate | Background (BG) | ILVs/GUVs     | Raw Value (ILV-BG) | Average (AVG) | ILVs/GUVs                                                  | Raw Value (ILV-BG) | Average (AVG) | % Normalized Budding (Raw values/NEC AVG) * 100 | Biological Replicate Average (%) |
|----------------------|---------------------|-----------------|---------------|--------------------|---------------|------------------------------------------------------------|--------------------|---------------|-------------------------------------------------|----------------------------------|
|                      |                     |                 | NEC220        |                    |               | NEC220 + UL25 <sup>native(45-94)</sup> (1:0.1 NEC:peptide) |                    |               |                                                 |                                  |
| 1                    | 1                   | 10/100 = 0.10   | 17/100 = 0.17 | 0.07               | 0.09          | 13/100 = 0.13                                              | 0.03               | 0.10          | 34                                              | 112                              |
|                      | 2                   | 6/100 = 0.06    | 15/100 = 0.15 | 0.09               |               | 19/95 = 0.20                                               | 0.14               |               | 161                                             |                                  |
|                      | 3                   | 8/100 = 0.08    | 18/100 = 0.18 | 0.10               |               | 19/95 = 0.20                                               | 0.12               |               | 138                                             |                                  |
| 2                    | 1                   | 3/96 = 0.03     | 23/99 = 0.23  | 0.20               | 0.15          | 20/99 = 0.20                                               | 0.17               | 0.17          | 112                                             | 111                              |
|                      | 2                   | 7/95 = 0.07     | 22/100 = 0.22 | 0.15               |               | 26/100 = 0.26                                              | 0.19               |               | 122                                             |                                  |
|                      | 3                   | 9/100 = 0.09    | 20/100 = 0.20 | 0.11               |               | 24/100 = 0.24                                              | 0.15               |               | 98                                              |                                  |
| 3                    | 1                   | 6/100 = 0.06    | 19/100 = 0.19 | 0.13               | 0.14          | 19/100 = 0.19                                              | 0.13               | 0.13          | 95                                              | 95                               |
|                      | 2                   | 7/100 = 0.07    | 19/100 = 0.19 | 0.12               |               | 19/90 = 0.21                                               | 0.14               |               | 103                                             |                                  |
|                      | 3                   | 2/100 = 0.02    | 18/100 = 0.18 | 0.16               |               | 14/100 = 0.14                                              | 0.12               |               | 88                                              |                                  |
|                      |                     |                 | NEC220        |                    |               | NEC220 + UL25 <sup>native(45-94)</sup> (1:0.3 NEC:peptide) |                    |               |                                                 |                                  |
| 1                    | 1                   | 3/96 = 0.03     | 23/99 = 0.23  | 0.20               | 0.15          | 15/100 = 0.15                                              | 0.12               | 0.11          | 78                                              | 71                               |
|                      | 2                   | 7/95 = 0.07     | 22/100 = 0.22 | 0.15               |               | 18/100 = 0.18                                              | 0.11               |               | 70                                              |                                  |
|                      | 3                   | 9/100 = 0.09    | 20/100 = 0.20 | 0.11               |               | 19/100 = 0.19                                              | 0.10               |               | 67                                              |                                  |
| 2                    | 1                   | 6/100 = 0.06    | 19/100 = 0.19 | 0.13               | 0.14          | 14/100 = 0.14                                              | 0.08               | 0.9           | 59                                              | 68                               |
|                      | 2                   | 7/100 = 0.07    | 19/100 = 0.19 | 0.12               |               | 13/100 = 0.13                                              | 0.06               |               | 44                                              |                                  |
|                      | 3                   | 2/100 = 0.02    | 18/100 = 0.18 | 0.16               |               | 16/100 = 0.16                                              | 0.14               |               | 102                                             |                                  |
| 3                    | 1                   | 1/100 = 0.01    | 17/90 = 0.19  | 0.18               | 0.14          | 14/100 = 0.14                                              | 0.13               | 0.11          | 91                                              | 75                               |
|                      | 2                   | 6/100 = 0.06    | 18/100 = 0.18 | 0.14               |               | 14/100 = 0.14                                              | 0.08               |               | 56                                              |                                  |
|                      | 3                   | 5/100 = 0.05    | 18/100 = 0.18 | 0.13               |               | 16/100 = 0.16                                              | 0.11               |               | 77                                              |                                  |
|                      |                     |                 | NEC220        |                    |               | NEC220 + UL25 <sup>native(45-94)</sup> (1:0.6 NEC:peptide) |                    |               |                                                 |                                  |
| 1                    | 1                   | 8/100 = 0.08    | 19/100 = 0.19 | 0.11               | 0.11          | 16/100 = 0.16                                              | 0.08               | 0.06          | 71                                              | 56                               |
|                      | 2                   | 9/100 = 0.09    | 18/100 = 0.18 | 0.09               |               | 17/100 = 0.17                                              | 0.08               |               | 71                                              |                                  |
|                      | 3                   | 8/100 = 0.08    | 22/100 = 0.22 | 0.14               |               | 11/100 = 0.11                                              | 0.03               |               | 26                                              |                                  |
| 2                    | 1                   | 6/100 = 0.06    | 19/100 = 0.19 | 0.13               | 0.14          | 13/95 = 0.14                                               | 0.08               | 0.08          | 56                                              | 58                               |
|                      | 2                   | 7/100 = 0.07    | 19/100 = 0.19 | 0.12               |               | 13/100 = 0.13                                              | 0.06               |               | 44                                              |                                  |
|                      | 3                   | 2/100 = 0.02    | 18/100 = 0.18 | 0.16               |               | 12/100 = 0.12                                              | 0.10               |               | 73                                              |                                  |
| 3                    | 1                   | 1/100 = 0.01    | 17/90 = 0.19  | 0.18               | 0.14          | 10/100 = 0.10                                              | 0.09               | 0.07          | 63                                              | 49                               |
|                      | 2                   | 6/100 = 0.06    | 18/100 = 0.18 | 0.14               |               | 11/100 = 0.11                                              | 0.05               |               | 35                                              |                                  |
|                      | 3                   | 5/100 = 0.05    | 18/100 = 0.18 | 0.13               |               | 12/100 = 0.12                                              | 0.07               |               | 49                                              |                                  |
|                      |                     |                 | NEC220        |                    |               | NEC220 + UL25 <sup>native(45-94)</sup> (1:1 NEC:peptide)   |                    |               |                                                 |                                  |
| 1                    | 1                   | 8/100 = 0.08    | 19/100 = 0.19 | 0.11               | 0.11          | 10/100 = 0.10                                              | 0.02               | 0.04          | 18                                              | 36                               |
|                      | 2                   | 9/100 = 0.09    | 18/100 = 0.18 | 0.09               |               | 13/97 = 0.13                                               | 0.04               |               | 39                                              |                                  |

| Biological Replicate | Technical Replicate | Background (BG) | ILVs/GUVs     | Raw Value (ILV-BG) | Average (AVG) | ILVs/GUVs                                                    | Raw Value (ILV-BG) | Average (AVG) | % Normalized Budding (Raw values/NEC AVG) * 100 | Biological Replicate Average (%) |
|----------------------|---------------------|-----------------|---------------|--------------------|---------------|--------------------------------------------------------------|--------------------|---------------|-------------------------------------------------|----------------------------------|
|                      | 3                   | 8/100 = 0.08    | 22/100 = 0.22 | 0.14               |               | 14/100 = 0.14                                                | 0.06               |               | 53                                              |                                  |
| 2                    | 1                   | 3/90 = 0.03     | 10/81 = 0.12  | 0.09               | 0.09          | 2/80 = 0.03                                                  | 0.00               | 0.02          | 9                                               | 19                               |
|                      | 2                   | 3/100 = 0.03    | 12/90 = 0.13  | 0.10               |               | 2/75 = 0.03                                                  | 0.00               |               | 3                                               |                                  |
|                      | 3                   | 3/85 = 0.04     | 9/80 = 0.11   | 0.07               |               | 7/80 = 0.09                                                  | 0.07               |               | 58                                              |                                  |
|                      |                     |                 |               |                    |               |                                                              |                    |               |                                                 |                                  |
| 3                    | 1                   | 5/100 = 0.05    | 12/100 = 0.12 | 0.07               | 0.10          | 7/100 = 0.07                                                 | 0.02               | 0.03          | 21                                              | 27                               |
|                      | 2                   | 6/100 = 0.06    | 16/105 = 0.15 | 0.09               |               | 8/100 = 0.08                                                 | 0.02               |               | 21                                              |                                  |
|                      | 3                   | 5/100 = 0.05    | 18/100 = 0.18 | 0.13               |               | 9/100 = 0.09                                                 | 0.04               |               | 41                                              |                                  |
|                      |                     |                 | NEC220        |                    |               | NEC220 + UL25 <sup>native(45-94)</sup><br>(1:10 NEC:peptide) |                    |               |                                                 |                                  |
| 1                    | 1                   | 3/96 = 0.03     | 23/99 = 0.23  | 0.20               | 0.15          | 11/100 = 0.11                                                | 0.08               | 0.05          | 52                                              | 30                               |
|                      | 2                   | 7/95 = 0.07     | 22/100 = 0.22 | 0.15               |               | 7/100 = 0.07                                                 | 0.00               |               | 0                                               |                                  |
|                      | 3                   | 9/100 = 0.09    | 20/100 = 0.20 | 0.11               |               | 15/100 = 0.15                                                | 0.06               |               | 39                                              |                                  |
| 2                    | 1                   | 3/100 = 0.03    | 13/94 = 0.14  | 0.11               | 0.07          | 3/100 = 0.03                                                 | 0.00               | 0.02          | 0                                               | 33                               |
|                      | 2                   | 4/100 = 0.04    | 8/90 = 0.09   | 0.05               |               | 5/91 = 0.05                                                  | 0.01               |               | 23                                              |                                  |
|                      | 3                   | 5/100 = 0.05    | 8/91 = 0.09   | 0.04               |               | 7/70 = 0.10                                                  | 0.05               |               | 77                                              |                                  |
| 3                    | 1                   | 5/100 = 0.05    | 12/100 = 0.12 | 0.07               | 0.10          | 8/100 = 0.08                                                 | 0.03               | 0.03          | 31                                              | 34                               |
|                      | 2                   | 6/100 = 0.06    | 16/105 = 0.15 | 0.09               |               | 9/100 = 0.09                                                 | 0.03               |               | 31                                              |                                  |
|                      | 3                   | 5/100 = 0.05    | 18/100 = 0.18 | 0.13               |               | 9/100 = 0.09                                                 | 0.04               |               | 41                                              |                                  |
|                      |                     |                 | NEC220        |                    |               | NEC220 + UL25 <sup>scr(45-94)</sup><br>(1:0.1 NEC:peptide)   |                    |               |                                                 |                                  |
| 1                    | 1                   | 10/100 = 0.10   | 17/100 = 0.17 | 0.07               | 0.09          | 21/100 = 0.21                                                | 0.11               | 0.10          | 127                                             | 115                              |
|                      | 2                   | 6/100 = 0.06    | 15/100 = 0.15 | 0.09               |               | 13/100 = 0.13                                                | 0.07               |               | 81                                              |                                  |
|                      | 3                   | 8/100 = 0.08    | 18/100 = 0.18 | 0.10               |               | 20/100 = 0.20                                                | 0.12               |               | 138                                             |                                  |
| 2                    | 1                   | 3/96 = 0.03     | 23/99 = 0.23  | 0.20               | 0.15          | 17/100 = 0.17                                                | 0.14               | 0.13          | 91                                              | 84                               |
|                      | 2                   | 7/95 = 0.07     | 22/100 = 0.22 | 0.15               |               | 18/100 = 0.18                                                | 0.11               |               | 70                                              |                                  |
|                      | 3                   | 9/100 = 0.09    | 20/100 = 0.20 | 0.11               |               | 23/100 = 0.23                                                | 0.14               |               | 92                                              |                                  |
| 3                    | 1                   | 6/100 = 0.06    | 19/100 = 0.19 | 0.13               | 0.14          | 19/96 = 0.20                                                 | 0.14               | 0.14          | 101                                             | 104                              |
|                      | 2                   | 7/100 = 0.07    | 19/100 = 0.19 | 0.12               |               | 18/100 = 0.18                                                | 0.11               |               | 80                                              |                                  |
|                      | 3                   | 2/100 = 0.02    | 18/100 = 0.18 | 0.16               |               | 20/100 = 0.20                                                | 0.18               |               | 132                                             |                                  |
|                      |                     |                 | NEC220        |                    |               | NEC220 + UL25 <sup>scr(45-94)</sup><br>(1:0.3 NEC:peptide)   |                    |               |                                                 |                                  |
| 1                    | 1                   | 3/96 = 0.03     | 23/99 = 0.23  | 0.20               | 0.15          | 20/100 = 0.20                                                | 0.17               | 0.10          | 111                                             | 65                               |
|                      | 2                   | 7/95 = 0.07     | 22/100 = 0.22 | 0.15               |               | 13/100 = 0.13                                                | 0.08               |               | 37                                              |                                  |
|                      | 3                   | 9/100 = 0.09    | 20/100 = 0.20 | 0.11               |               | 16/98 = 0.16                                                 | 0.07               |               | 48                                              |                                  |
| 2                    | 1                   | 6/100 = 0.06    | 19/100 = 0.19 | 0.13               | 0.14          | 14/90 = 0.16                                                 | 0.10               | 0.11          | 70                                              | 82                               |
|                      | 2                   | 7/100 = 0.07    | 19/100 = 0.19 | 0.12               |               | 18/100 = 0.18                                                | 0.11               |               | 80                                              |                                  |
|                      | 3                   | 2/100 = 0.02    | 18/100 = 0.18 | 0.16               |               | 15/100 = 0.15                                                | 0.13               |               | 95                                              |                                  |
| 3                    | 1                   | 1/100 = 0.01    | 17/90 = 0.19  | 0.18               | 0.14          | 15/100 = 0.15                                                | 0.14               | 0.11          | 98                                              | 77                               |
|                      | 2                   | 6/100 = 0.06    | 18/100 = 0.18 | 0.14               |               | 15/100 = 0.15                                                | 0.09               |               | 63                                              |                                  |
|                      | 3                   | 5/100 = 0.05    | 18/100 = 0.18 | 0.13               |               | 15/100 = 0.15                                                | 0.10               |               | 70                                              |                                  |

| Biological Replicate | Technical Replicate | Background (BG) | ILVs/GUVs     | Raw Value (ILV-BG) | Average (AVG) | ILVs/GUVs                                                  | Raw Value (ILV-BG) | Average (AVG) | % Normalized Budding (Raw values/NEC AVG) * 100 | Biological Replicate Average (%) |
|----------------------|---------------------|-----------------|---------------|--------------------|---------------|------------------------------------------------------------|--------------------|---------------|-------------------------------------------------|----------------------------------|
|                      |                     |                 | NEC220        |                    |               | NEC220 + UL25 <sup>scr(45-94)</sup><br>(1:0.6 NEC:peptide) |                    |               |                                                 |                                  |
| 1                    | 1                   | 8/100 = 0.08    | 19/100 = 0.19 | 0.11               | 0.11          | 15/90 = 0.17                                               |                    | 0.07          | 76                                              | 61                               |
|                      | 2                   | 9/100 = 0.09    | 18/100 = 0.18 | 0.09               |               | 15/100 = 0.15                                              | 0.06               |               | 52                                              |                                  |
|                      | 3                   | 8/100 = 0.08    | 22/100 = 0.22 | 0.14               |               | 14/100 = 0.14                                              | 0.06               |               | 53                                              |                                  |
| 2                    | 1                   | 6/100 = 0.06    | 19/100 = 0.19 | 0.13               | 0.14          | 13/100 = 0.13                                              | 0.07               | 0.08          | 51                                              | 62                               |
|                      | 2                   | 7/100 = 0.07    | 19/100 = 0.19 | 0.12               |               | 12/90 = 0.13                                               | 0.06               |               | 46                                              |                                  |
|                      | 3                   | 2/100 = 0.02    | 18/100 = 0.18 | 0.16               |               | 14/100 = 0.14                                              | 0.12               |               | 88                                              |                                  |
| 3                    | 1                   | 1/100 = 0.01    | 17/90 = 0.19  | 0.18               | 0.14          | 12/100 = 0.12                                              | 0.11               | 0.08          | 78                                              | 56                               |
|                      | 2                   | 6/100 = 0.06    | 18/100 = 0.18 | 0.14               |               | 11/100 = 0.11                                              | 0.05               |               | 35                                              |                                  |
|                      | 3                   | 5/100 = 0.05    | 18/100 = 0.18 | 0.13               |               | 13/100 = 0.13                                              | 0.08               |               | 56                                              |                                  |
|                      |                     |                 | NEC220        |                    |               | NEC220 + UL25 <sup>scr(45-94)</sup><br>(1:1 NEC:peptide)   |                    |               |                                                 |                                  |
| 1                    | 1                   | 8/100 = 0.08    | 19/100 = 0.19 | 0.11               | 0.11          | 13/100 = 0.13                                              | 0.05               | 0.04          | 44                                              | 38                               |
|                      | 2                   | 9/100 = 0.09    | 18/100 = 0.18 | 0.09               |               | 13/100 = 0.13                                              | 0.04               |               | 35                                              |                                  |
|                      | 3                   | 8/100 = 0.08    | 22/100 = 0.22 | 0.14               |               | 12/100 = 0.12                                              | 0.04               |               | 35                                              |                                  |
| 2                    | 1                   | 3/90 = 0.03     | 10/81 = 0.12  | 0.09               | 0.09          | 7/76 = 0.09                                                | 0.06               | 0.02          | 65                                              | 27                               |
|                      | 2                   | 3/100 = 0.03    | 12/90 = 0.13  | 0.10               |               | 4/100 = 0.04                                               | 0.01               |               | 11                                              |                                  |
|                      | 3                   | 3/85 = 0.04     | 9/80 = 0.11   | 0.07               |               | 4/100 = 0.04                                               | 0.00               |               | 5                                               |                                  |
| 3                    | 1                   | 5/100 = 0.05    | 12/100 = 0.12 | 0.07               | 0.10          | 11/100 = 0.11                                              | 0.06               | 0.02          | 62                                              | 25                               |
|                      | 2                   | 6/100 = 0.06    | 16/105 = 0.15 | 0.09               |               | 6/97 = 0.06                                                | 0.00               |               | 2                                               |                                  |
|                      | 3                   | 5/100 = 0.05    | 18/100 = 0.18 | 0.13               |               | 6/100 = 0.06                                               | 0.01               |               | 10                                              |                                  |
|                      |                     |                 | NEC220        |                    |               | NEC220 + UL25 <sup>scr(45-94)</sup><br>(1:10 NEC:peptide)  |                    |               |                                                 |                                  |
| 1                    | 1                   | 3/96 = 0.03     | 23/99 = 0.23  | 0.20               | 0.15          | 9/95 = 0.09                                                | 0.06               | 0.05          | 42                                              | 31                               |
|                      | 2                   | 7/95 = 0.07     | 22/100 = 0.22 | 0.15               |               | 13/100 = 0.13                                              | 0.08               |               | 37                                              |                                  |
|                      | 3                   | 9/100 = 0.09    | 20/100 = 0.20 | 0.11               |               | 11/100 = 0.11                                              | 0.02               |               | 13                                              |                                  |
| 2                    | 1                   | 3/100 = 0.03    | 13/94 = 0.14  | 0.11               | 0.07          | 6/100 = 0.06                                               | 0.03               | 0.02          | 46                                              | 29                               |
|                      | 2                   | 4/100 = 0.04    | 8/90 = 0.09   | 0.05               |               | 5/81 = 0.06                                                | 0.02               |               | 33                                              |                                  |
|                      | 3                   | 5/100 = 0.05    | 8/91 = 0.09   | 0.04               |               | 4/72 = 0.06                                                | 0.01               |               | 9                                               |                                  |
| 3                    | 1                   | 5/100 = 0.05    | 12/100 = 0.12 | 0.07               | 0.10          | 9/100 = 0.09                                               | 0.04               | 0.03          | 41                                              | 32                               |
|                      | 2                   | 6/100 = 0.06    | 16/105 = 0.15 | 0.09               |               | 7/100 = 0.07                                               | 0.01               |               | 10                                              |                                  |
|                      | 3                   | 5/100 = 0.05    | 18/100 = 0.18 | 0.13               |               | 9/95 = 0.09                                                | 0.04               |               | 46                                              |                                  |
|                      |                     |                 | NEC220        |                    |               | NEC220 + UL25 <sup>74-94</sup><br>(1:0.1 NEC:peptide)      |                    |               |                                                 |                                  |
| 1                    | 1                   | 10/100 = 0.10   | 17/100 = 0.17 | 0.07               | 0.09          | 15/100 = 0.15                                              | 0.05               | 0.08          | 58                                              | 96                               |
|                      | 2                   | 6/100 = 0.06    | 15/100 = 0.15 | 0.09               |               | 17/100 = 0.17                                              | 0.11               |               | 127                                             |                                  |
|                      | 3                   | 8/100 = 0.08    | 18/100 = 0.18 | 0.10               |               | 17/100 = 0.17                                              | 0.09               |               | 104                                             |                                  |
| 2                    | 1                   | 3/96 = 0.03     | 23/99 = 0.23  | 0.20               | 0.15          | 21/100 = 0.21                                              | 0.18               | 0.15          | 117                                             | 97                               |



| Biological Replicate | Technical Replicate | Background (BG) | ILVs/GUVs     | Raw Value (ILV-BG) | Average (AVG) | ILVs/GUVs                                             | Raw Value (ILV-BG) | Average (AVG) | % Normalized Budding (Raw values/NEC AVG) * 100 | Biological Replicate Average (%) |
|----------------------|---------------------|-----------------|---------------|--------------------|---------------|-------------------------------------------------------|--------------------|---------------|-------------------------------------------------|----------------------------------|
|                      | 2                   | 7/95 = 0.07     | 22/100 = 0.22 | 0.15               |               | 23/100 = 0.23                                         | 0.16               |               | 102                                             |                                  |
|                      | 3                   | 9/100 = 0.09    | 20/100 = 0.20 | 0.11               |               | 20/100 = 0.20                                         | 0.11               |               | 72                                              |                                  |
| 3                    | 1                   | 6/100 = 0.06    | 19/100 = 0.19 | 0.13               | 0.14          | 17/90 = 0.19                                          | 0.13               | 0.13          | 94                                              | 97                               |
|                      | 2                   | 7/100 = 0.07    | 19/100 = 0.19 | 0.12               |               | 21/100 = 0.21                                         | 0.14               |               | 102                                             |                                  |
|                      | 3                   | 2/100 = 0.02    | 18/100 = 0.18 | 0.16               |               | 15/100 = 0.15                                         | 0.13               |               | 95                                              |                                  |
|                      |                     |                 | NEC220        |                    |               | NEC220 + UL25 <sup>74-94</sup><br>(1:0.3 NEC:peptide) |                    |               |                                                 |                                  |
| 1                    | 1                   | 3/96 = 0.03     | 23/99 = 0.23  | 0.20               | 0.15          | 25/100 = 0.25                                         | 0.22               | 0.16          | 143                                             | 102                              |
|                      | 2                   | 7/95 = 0.07     | 22/100 = 0.22 | 0.15               |               | 23/100 = 0.23                                         | 0.16               |               | 103                                             |                                  |
|                      | 3                   | 9/100 = 0.09    | 20/100 = 0.20 | 0.11               |               | 18/100 = 0.18                                         | 0.09               |               | 59                                              |                                  |
| 2                    | 1                   | 6/100 = 0.06    | 19/100 = 0.19 | 0.13               | 0.14          | 17/100 = 0.17                                         | 0.11               | 0.13          | 80                                              | 98                               |
|                      | 2                   | 7/100 = 0.07    | 19/100 = 0.19 | 0.12               |               | 17/100 = 0.17                                         | 0.11               |               | 73                                              |                                  |
|                      | 3                   | 2/100 = 0.02    | 18/100 = 0.18 | 0.16               |               | 21/100 = 0.21                                         | 0.19               |               | 139                                             |                                  |
| 3                    | 1                   | 1/100 = 0.01    | 17/90 = 0.19  | 0.18               | 0.14          | 17/90 = 0.19                                          | 0.18               | 0.14          | 125                                             | 98                               |
|                      | 2                   | 6/100 = 0.06    | 18/100 = 0.18 | 0.14               |               | 17/100 = 0.17                                         | 0.11               |               | 77                                              |                                  |
|                      | 3                   | 5/100 = 0.05    | 18/100 = 0.18 | 0.13               |               | 18/100 = 0.18                                         | 0.13               |               | 91                                              |                                  |
|                      |                     |                 | NEC220        |                    |               | NEC220 + UL25 <sup>74-94</sup><br>(1:0.6 NEC:peptide) |                    |               |                                                 |                                  |
| 1                    | 1                   | 6/100 = 0.06    | 19/100 = 0.19 | 0.13               | 0.14          | 18/100 = 0.18                                         | 0.12               | 0.12          | 88                                              | 87                               |
|                      | 2                   | 7/100 = 0.07    | 19/100 = 0.19 | 0.12               |               | 16/95 = 0.17                                          | 0.10               |               | 72                                              |                                  |
|                      | 3                   | 2/100 = 0.02    | 18/100 = 0.18 | 0.16               |               | 16/100 = 0.16                                         | 0.14               |               | 102                                             |                                  |
| 2                    | 1                   | 1/100 = 0.01    | 17/90 = 0.19  | 0.18               | 0.14          | 18/93 = 0.19                                          | 0.18               | 0.15          | 128                                             | 103                              |
|                      | 2                   | 6/100 = 0.06    | 18/100 = 0.18 | 0.14               |               | 20/100 = 0.20                                         | 0.14               |               | 98                                              |                                  |
|                      | 3                   | 5/100 = 0.05    | 18/100 = 0.18 | 0.13               |               | 17/100 = 0.17                                         | 0.12               |               | 84                                              |                                  |
| 3                    | 1                   | 8/100 = 0.08    | 19/100 = 0.19 | 0.11               | 0.11          | 17/100 = 0.17                                         | 0.09               | 0.10          | 80                                              | 90                               |
|                      | 2                   | 9/100 = 0.09    | 18/100 = 0.18 | 0.09               |               | 20/100 = 0.20                                         | 0.11               |               | 97                                              |                                  |
|                      | 3                   | 8/100 = 0.08    | 22/100 = 0.22 | 0.14               |               | 18/96 = 0.19                                          | 0.11               |               | 95                                              |                                  |
|                      |                     |                 | NEC220        |                    |               | NEC220 + UL25 <sup>74-94</sup><br>(1:1 NEC:peptide)   |                    |               |                                                 |                                  |
| 1                    | 1                   | 8/100 = 0.08    | 19/100 = 0.19 | 0.11               | 0.11          | 15/96 = 0.16                                          | 0.08               | 0.09          | 67                                              | 75                               |
|                      | 2                   | 9/100 = 0.09    | 18/100 = 0.18 | 0.09               |               | 18/100 = 0.18                                         | 0.09               |               | 79                                              |                                  |
|                      | 3                   | 8/100 = 0.08    | 22/100 = 0.22 | 0.14               |               | 17/100 = 0.17                                         | 0.09               |               | 79                                              |                                  |
| 2                    | 1                   | 1/100 = 0.01    | 17/90 = 0.19  | 0.18               | 0.14          | 16/100 = 0.16                                         | 0.15               | 0.13          | 105                                             | 93                               |
|                      | 2                   | 6/100 = 0.06    | 18/100 = 0.18 | 0.14               |               | 18/100 = 0.18                                         | 0.12               |               | 84                                              |                                  |
|                      | 3                   | 5/100 = 0.05    | 18/100 = 0.18 | 0.13               |               | 18/100 = 0.18                                         | 0.13               |               | 91                                              |                                  |
| 3                    | 1                   | 5/100 = 0.05    | 12/100 = 0.12 | 0.07               | 0.10          | 10/100 = 0.10                                         | 0.05               | 0.05          | 51                                              | 55                               |
|                      | 2                   | 6/100 = 0.06    | 16/105 = 0.15 | 0.09               |               | 10/100 = 0.10                                         | 0.04               |               | 41                                              |                                  |
|                      | 3                   | 5/100 = 0.05    | 18/100 = 0.18 | 0.13               |               | 12/100 = 0.12                                         | 0.07               |               | 72                                              |                                  |

| Biological Replicate | Technical Replicate | Background (BG) | ILVs/GUVs     | Raw Value (ILV-BG) | Average (AVG) | ILVs/GUVs                                                | Raw Value (ILV-BG) | Average (AVG) | % Normalized Budding (Raw values/NEC AVG) * 100 | Biological Replicate Average (%) |
|----------------------|---------------------|-----------------|---------------|--------------------|---------------|----------------------------------------------------------|--------------------|---------------|-------------------------------------------------|----------------------------------|
|                      |                     |                 | NEC220        |                    |               | NEC220 + UL25 <sup>74-94</sup><br>(1:10 NEC:peptide)     |                    |               |                                                 |                                  |
| 1                    | 1                   | 3/96 = 0.03     | 23/99 = 0.23  | 0.20               | 0.15          | 17/100 = 0.17                                            | 0.14               | 0.10          | 91                                              | 64                               |
|                      | 2                   | 7/95 = 0.07     | 22/100 = 0.22 | 0.15               |               | 14/96 = 0.15                                             | 0.08               |               | 47                                              |                                  |
|                      | 3                   | 9/100 = 0.09    | 20/100 = 0.20 | 0.11               |               | 17/100 = 0.17                                            | 0.08               |               | 52                                              |                                  |
| 2                    | 1                   | 3/100 = 0.03    | 13/94 = 0.14  | 0.11               | 0.07          | 6/97 = 0.06                                              | 0.03               | 0.04          | 49                                              | 66                               |
|                      | 2                   | 4/100 = 0.04    | 8/90 = 0.09   | 0.05               |               | 6/100 = 0.06                                             | 0.02               |               | 31                                              |                                  |
|                      | 3                   | 5/100 = 0.05    | 8/91 = 0.09   | 0.04               |               | 12/95 = 0.13                                             | 0.08               |               | 117                                             |                                  |
| 3                    | 1                   | 5/100 = 0.05    | 12/100 = 0.12 | 0.07               | 0.10          | 15/100 = 0.15                                            | 0.10               | 0.07          | 103                                             | 72                               |
|                      | 2                   | 6/100 = 0.06    | 16/105 = 0.15 | 0.09               |               | 11/100 = 0.11                                            | 0.05               |               | 51                                              |                                  |
|                      | 3                   | 5/100 = 0.05    | 18/100 = 0.18 | 0.13               |               | 11/100 = 0.11                                            | 0.06               |               | 62                                              |                                  |
|                      |                     |                 | NEC220        |                    |               | NEC220 + gB RC <sup>103-152</sup><br>(1:0.1 NEC:peptide) |                    |               |                                                 |                                  |
| 1                    | 1                   | 10/100 = 0.10   | 17/100 = 0.17 | 0.07               | 0.09          | 20/100 = 0.20                                            | 0.10               | 0.10          | 115                                             | 115                              |
|                      | 2                   | 6/100 = 0.06    | 15/100 = 0.15 | 0.09               |               | 17/100 = 0.17                                            | 0.11               |               | 127                                             |                                  |
|                      | 3                   | 8/100 = 0.08    | 18/100 = 0.18 | 0.10               |               | 17/100 = 0.17                                            | 0.09               |               | 104                                             |                                  |
| 2                    | 1                   | 3/96 = 0.03     | 23/99 = 0.23  | 0.20               | 0.15          | 22/100 = 0.22                                            | 0.19               | 0.18          | 124                                             | 120                              |
|                      | 2                   | 7/95 = 0.07     | 22/100 = 0.22 | 0.15               |               | 25/98 = 0.26                                             | 0.19               |               | 119                                             |                                  |
|                      | 3                   | 9/100 = 0.09    | 20/100 = 0.20 | 0.11               |               | 24/90 = 0.27                                             | 0.18               |               | 116                                             |                                  |
| 3                    | 1                   | 6/100 = 0.06    | 19/100 = 0.19 | 0.13               | 0.14          | 19/90 = 0.21                                             | 0.15               | 0.15          | 111                                             | 107                              |
|                      | 2                   | 7/100 = 0.07    | 19/100 = 0.19 | 0.12               |               | 16/100 = 0.16                                            | 0.09               |               | 66                                              |                                  |
|                      | 3                   | 2/100 = 0.02    | 18/100 = 0.18 | 0.16               |               | 21/97 = 0.22                                             | 0.20               |               | 144                                             |                                  |
|                      |                     |                 | NEC220        |                    |               | NEC220 + gB RC <sup>103-152</sup><br>(1:0.3 NEC:peptide) |                    |               |                                                 |                                  |
| 1                    | 1                   | 3/96 = 0.03     | 23/99 = 0.23  | 0.20               | 0.15          | 21/100 = 0.21                                            | 0.18               | 0.16          | 117                                             | 102                              |
|                      | 2                   | 7/95 = 0.07     | 22/100 = 0.22 | 0.15               |               | 23/100 = 0.23                                            | 0.16               |               | 103                                             |                                  |
|                      | 3                   | 9/100 = 0.09    | 20/100 = 0.20 | 0.11               |               | 22/100 = 0.22                                            | 0.13               |               | 85                                              |                                  |
| 2                    | 1                   | 6/100 = 0.06    | 19/100 = 0.19 | 0.13               | 0.14          | 18/100 = 0.18                                            | 0.12               | 0.14          | 88                                              | 105                              |
|                      | 2                   | 7/100 = 0.07    | 19/100 = 0.19 | 0.12               |               | 21/100 = 0.21                                            | 0.14               |               | 102                                             |                                  |
|                      | 3                   | 2/100 = 0.02    | 18/100 = 0.18 | 0.16               |               | 19/100 = 0.19                                            | 0.17               |               | 124                                             |                                  |
| 3                    | 1                   | 1/100 = 0.01    | 17/90 = 0.19  | 0.18               | 0.14          | 17/100 = 0.17                                            | 0.16               | 0.14          | 112                                             | 96                               |
|                      | 2                   | 6/100 = 0.06    | 18/100 = 0.18 | 0.14               |               | 18/100 = 0.18                                            | 0.12               |               | 84                                              |                                  |
|                      | 3                   | 5/100 = 0.05    | 18/100 = 0.18 | 0.13               |               | 17/100 = 0.17                                            | 0.12               |               | 91                                              |                                  |
|                      |                     |                 | NEC220        |                    |               | NEC220 + gB RC <sup>103-152</sup><br>(1:0.6 NEC:peptide) |                    |               |                                                 |                                  |
| 1                    | 1                   | 6/100 = 0.06    | 19/100 = 0.19 | 0.13               | 0.14          | 16/100 = 0.16                                            | 0.10               | 0.12          | 73                                              | 85                               |
|                      | 2                   | 7/100 = 0.07    | 19/100 = 0.19 | 0.12               |               | 14/100 = 0.14                                            | 0.07               |               | 51                                              |                                  |
|                      | 3                   | 2/100 = 0.02    | 18/100 = 0.18 | 0.16               |               | 20/100 = 0.20                                            | 0.18               |               | 132                                             |                                  |
| 2                    | 1                   | 1/100 = 0.01    | 17/90 = 0.19  | 0.18               | 0.14          | 16/100 = 0.16                                            | 0.15               | 0.13          | 105                                             | 93                               |
|                      | 2                   | 6/100 = 0.06    | 18/100 = 0.18 | 0.14               |               | 19/100 = 0.19                                            | 0.13               |               | 91                                              |                                  |

| Biological Replicate | Technical Replicate | Background (BG) | ILVs/GUVs     | Raw Value (ILV-BG) | Average (AVG) | ILVs/GUVs                                                | Raw Value (ILV-BG) | Average (AVG) | % Normalized Budding (Raw values/NEC AVG) * 100 | Biological Replicate Average (%) |
|----------------------|---------------------|-----------------|---------------|--------------------|---------------|----------------------------------------------------------|--------------------|---------------|-------------------------------------------------|----------------------------------|
|                      | 3                   | 5/100 = 0.05    | 18/100 = 0.18 | 0.13               |               | 16/94 = 0.17                                             | 0.12               |               | 84                                              |                                  |
| 3                    | 1                   | 8/100 = 0.08    | 19/100 = 0.19 | 0.11               | 0.11          | 16/100 = 0.16                                            | 0.08               | 0.10          | 71                                              | 91                               |
|                      | 2                   | 9/100 = 0.09    | 18/100 = 0.18 | 0.09               |               | 18/100 = 0.18                                            | 0.09               |               | 80                                              |                                  |
|                      | 3                   | 8/100 = 0.08    | 22/100 = 0.22 | 0.14               |               | 22/100 = 0.22                                            | 0.14               |               | 124                                             |                                  |
|                      |                     |                 |               |                    |               |                                                          |                    |               |                                                 |                                  |
|                      |                     |                 | NEC220        |                    |               | NEC220 + gB RC <sup>103-152</sup> (1:1 NEC:peptide)      |                    |               |                                                 |                                  |
| 1                    | 1                   | 8/100 = 0.08    | 19/100 = 0.19 | 0.11               | 0.11          | 18/95 = 0.19                                             | 0.11               | 0.12          | 97                                              | 103                              |
|                      | 2                   | 9/100 = 0.09    | 18/100 = 0.18 | 0.09               |               | 19/100 = 0.19                                            | 0.10               |               | 88                                              |                                  |
|                      | 3                   | 8/100 = 0.08    | 22/100 = 0.22 | 0.14               |               | 22/100 = 0.22                                            | 0.14               |               | 124                                             |                                  |
| 2                    | 1                   | 1/100 = 0.01    | 17/90 = 0.19  | 0.18               | 0.14          | 17/100 = 0.17                                            | 0.16               | 0.14          | 112                                             | 98                               |
|                      | 2                   | 6/100 = 0.06    | 18/100 = 0.18 | 0.14               |               | 16/100 = 0.16                                            | 0.10               |               | 70                                              |                                  |
|                      | 3                   | 5/100 = 0.05    | 18/100 = 0.18 | 0.13               |               | 19/90 = 0.21                                             | 0.16               |               | 113                                             |                                  |
| 3                    | 1                   | 5/100 = 0.05    | 12/100 = 0.12 | 0.07               | 0.10          | 13/100 = 0.13                                            | 0.08               | 0.08          | 82                                              | 82                               |
|                      | 2                   | 6/100 = 0.06    | 16/105 = 0.15 | 0.09               |               | 15/100 = 0.15                                            | 0.09               |               | 92                                              |                                  |
|                      | 3                   | 5/100 = 0.05    | 18/100 = 0.18 | 0.13               |               | 12/100 = 0.12                                            | 0.07               |               | 72                                              |                                  |
|                      |                     |                 | NEC220        |                    |               | NEC220 + gB RC <sup>103-152</sup> (1:10 NEC:peptide)     |                    |               |                                                 |                                  |
| 1                    | 1                   | 3/96 = 0.03     | 23/99 = 0.23  | 0.20               | 0.15          | 20/91 = 0.22                                             | 0.19               | 0.12          | 124                                             | 82                               |
|                      | 2                   | 7/95 = 0.07     | 22/100 = 0.22 | 0.15               |               | 19/100 = 0.19                                            | 0.12               |               | 76                                              |                                  |
|                      | 3                   | 9/100 = 0.09    | 20/100 = 0.20 | 0.11               |               | 16/100 = 0.16                                            | 0.07               |               | 46                                              |                                  |
| 2                    | 1                   | 3/100 = 0.03    | 13/94 = 0.14  | 0.11               | 0.07          | 9/90 = 0.10                                              | 0.07               | 0.05          | 108                                             | 73                               |
|                      | 2                   | 4/100 = 0.04    | 8/90 = 0.09   | 0.05               |               | 8/90 = 0.09                                              | 0.05               |               | 75                                              |                                  |
|                      | 3                   | 5/100 = 0.05    | 8/91 = 0.09   | 0.04               |               | 5/67 = 0.07                                              | 0.02               |               | 38                                              |                                  |
| 3                    | 1                   | 5/100 = 0.05    | 12/100 = 0.12 | 0.07               | 0.10          | 9/97 = 0.09                                              | 0.04               | 0.06          | 44                                              | 63                               |
|                      | 2                   | 6/100 = 0.06    | 16/105 = 0.15 | 0.09               |               | 12/100 = 0.12                                            | 0.06               |               | 62                                              |                                  |
|                      | 3                   | 5/100 = 0.05    | 18/100 = 0.18 | 0.13               |               | 13/100 = 0.13                                            | 0.08               |               | 82                                              |                                  |
|                      |                     |                 | NEC220        |                    |               | NEC220 + (EAEKAAK) <sub>7</sub> EAEK (1:0.1 NEC:peptide) |                    |               |                                                 |                                  |
| 1                    | 1                   | 3/96 = 0.03     | 23/99 = 0.23  | 0.20               | 0.15          | 22/100 = 0.22                                            | 0.19               | 0.15          | 124                                             | 97                               |
|                      | 2                   | 7/95 = 0.07     | 22/100 = 0.22 | 0.15               |               | 24/100 = 0.24                                            | 0.17               |               | 109                                             |                                  |
|                      | 3                   | 9/100 = 0.09    | 20/100 = 0.20 | 0.11               |               | 18/100 = 0.18                                            | 0.09               |               | 59                                              |                                  |
| 2                    | 1                   | 6/100 = 0.06    | 19/100 = 0.19 | 0.13               | 0.14          | 21/93 = 0.23                                             | 0.17               | 0.15          | 121                                             | 109                              |
|                      | 2                   | 7/100 = 0.07    | 19/100 = 0.19 | 0.12               |               | 19/100 = 0.19                                            | 0.12               |               | 88                                              |                                  |
|                      | 3                   | 2/100 = 0.02    | 18/100 = 0.18 | 0.16               |               | 18/100 = 0.18                                            | 0.16               |               | 117                                             |                                  |
| 3                    | 1                   | 8/100 = 0.08    | 19/100 = 0.19 | 0.11               | 0.11          | 17/100 = 0.17                                            | 0.09               | 0.09          | 80                                              | 82                               |
|                      | 2                   | 9/100 = 0.09    | 18/100 = 0.18 | 0.09               |               | 16/100 = 0.16                                            | 0.07               |               | 62                                              |                                  |
|                      | 3                   | 8/100 = 0.08    | 22/100 = 0.22 | 0.14               |               | 20/100 = 0.20                                            | 0.12               |               | 106                                             |                                  |
|                      |                     |                 | NEC220        |                    |               | NEC220 + (EAEKAAK) <sub>7</sub> EAEK (1:0.3 NEC:peptide) |                    |               |                                                 |                                  |
| 1                    | 1                   | 3/96 = 0.03     | 23/99 = 0.23  | 0.20               | 0.15          | 23/100 = 0.23                                            | 0.20               | 0.15          | 130                                             | 99                               |

| Biological Replicate | Technical Replicate | Background (BG) | ILVs/GUVs     | Raw Value (ILV-BG) | Average (AVG) | ILVs/GUVs                                                    | Raw Value (ILV-BG)                                            | Average (AVG) | % Normalized Budding (Raw values/NEC AVG) * 100 | Biological Replicate Average (%) |
|----------------------|---------------------|-----------------|---------------|--------------------|---------------|--------------------------------------------------------------|---------------------------------------------------------------|---------------|-------------------------------------------------|----------------------------------|
|                      | 2                   | 7/95 = 0.07     | 22/100 = 0.22 | 0.15               |               | 20/100 = 0.20                                                | 0.13                                                          |               | 83                                              |                                  |
|                      | 3                   | 9/100 = 0.09    | 20/100 = 0.20 | 0.11               |               | 21/96 = 0.22                                                 | 0.13                                                          |               | 84                                              |                                  |
|                      | 1                   | 6/100 = 0.06    | 19/100 = 0.19 | 0.13               |               | 20/100 = 0.20                                                | 0.14                                                          |               | 102                                             |                                  |
| 2                    | 2                   | 7/100 = 0.07    | 19/100 = 0.19 | 0.12               | 0.14          | 18/100 = 0.18                                                | 0.11                                                          | 0.13          | 80                                              | 95                               |
|                      | 3                   | 2/100 = 0.02    | 18/100 = 0.18 | 0.16               |               | 16/100 = 0.16                                                | 0.14                                                          |               | 102                                             |                                  |
|                      | 1                   | 1/100 = 0.01    | 17/90 = 0.19  | 0.18               |               | 17/100 = 0.17                                                | 0.16                                                          |               | 112                                             |                                  |
| 3                    | 2                   | 6/100 = 0.06    | 18/100 = 0.18 | 0.14               | 0.14          | 16/100 = 0.16                                                | 0.10                                                          | 0.14          | 70                                              | 96                               |
|                      | 3                   | 5/100 = 0.05    | 18/100 = 0.18 | 0.13               |               | 20/100 = 0.20                                                | 0.15                                                          |               | 105                                             |                                  |
|                      |                     |                 |               | <b>NEC220</b>      |               |                                                              | <b>NEC220 + (EAEKAAK)<sub>7</sub>EAEK (1:0.6 NEC:peptide)</b> |               |                                                 |                                  |
| 1                    | 1                   | 6/100 = 0.06    | 19/100 = 0.19 | 0.13               | 0.14          | 18/100 = 0.18                                                | 0.12                                                          | 0.12          | 88                                              | 88                               |
|                      | 2                   | 7/100 = 0.07    | 19/100 = 0.19 | 0.12               |               | 15/100 = 0.15                                                | 0.08                                                          |               | 58                                              |                                  |
|                      | 3                   | 2/100 = 0.02    | 18/100 = 0.18 | 0.16               |               | 18/100 = 0.18                                                | 0.16                                                          |               | 117                                             |                                  |
| 2                    | 1                   | 1/100 = 0.01    | 17/90 = 0.19  | 0.18               | 0.14          | 19/100 = 0.19                                                | 0.18                                                          | 0.16          | 126                                             | 112                              |
|                      | 2                   | 6/100 = 0.06    | 18/100 = 0.18 | 0.14               |               | 21/100 = 0.21                                                | 0.15                                                          |               | 105                                             |                                  |
|                      | 3                   | 5/100 = 0.05    | 18/100 = 0.18 | 0.13               |               | 20/100 = 0.20                                                | 0.15                                                          |               | 105                                             |                                  |
| 3                    | 1                   | 8/100 = 0.08    | 19/100 = 0.19 | 0.11               | 0.11          | 16/95 = 0.17                                                 | 0.09                                                          | 0.10          | 78                                              | 85                               |
|                      | 2                   | 9/100 = 0.09    | 18/100 = 0.18 | 0.09               |               | 15/100 = 0.15                                                | 0.06                                                          |               | 53                                              |                                  |
|                      | 3                   | 8/100 = 0.08    | 22/100 = 0.22 | 0.14               |               | 22/100 = 0.22                                                | 0.14                                                          |               | 124                                             |                                  |
|                      |                     |                 | <b>NEC220</b> |                    |               | <b>NEC220 + (EAEKAAK)<sub>7</sub>EAEK (1:1 NEC:peptide)</b>  |                                                               |               |                                                 |                                  |
| 1                    | 1                   | 8/100 = 0.08    | 19/100 = 0.19 | 0.11               | 0.11          | 19/90 = 0.21                                                 | 0.13                                                          | 0.12          | 116                                             | 106                              |
|                      | 2                   | 9/100 = 0.09    | 18/100 = 0.18 | 0.09               |               | 21/100 = 0.21                                                | 0.12                                                          |               | 106                                             |                                  |
|                      | 3                   | 8/100 = 0.08    | 22/100 = 0.22 | 0.14               |               | 19/100 = 0.19                                                | 0.08                                                          |               | 97                                              |                                  |
| 2                    | 1                   | 6/100 = 0.06    | 19/100 = 0.19 | 0.13               | 0.14          | 18/100 = 0.18                                                | 0.12                                                          | 0.12          | 88                                              | 90                               |
|                      | 2                   | 7/100 = 0.07    | 19/100 = 0.19 | 0.12               |               | 17/100 = 0.17                                                | 0.10                                                          |               | 73                                              |                                  |
|                      | 3                   | 2/100 = 0.02    | 18/100 = 0.18 | 0.16               |               | 17/100 = 0.17                                                | 0.15                                                          |               | 110                                             |                                  |
| 3                    | 1                   | 1/100 = 0.01    | 17/90 = 0.19  | 0.18               | 0.14          | 15/90 = 0.17                                                 | 0.16                                                          | 0.16          | 110                                             | 102                              |
|                      | 2                   | 6/100 = 0.06    | 18/100 = 0.18 | 0.14               |               | 18/100 = 0.18                                                | 0.12                                                          |               | 84                                              |                                  |
|                      | 3                   | 5/100 = 0.05    | 18/100 = 0.18 | 0.13               |               | 21/100 = 0.21                                                | 0.16                                                          |               | 112                                             |                                  |
|                      |                     |                 | <b>NEC220</b> |                    |               | <b>NEC220 + (EAEKAAK)<sub>7</sub>EAEK (1:10 NEC:peptide)</b> |                                                               |               |                                                 |                                  |
| 1                    | 1                   | 9/100 = 0.09    | 0.04          | 0.05               | 0.06          | 19/99 = 0.19                                                 | 0.15                                                          | 0.15          | 34                                              | 40                               |
|                      | 2                   | 11/100 = 0.11   | 0.04          | 0.07               |               | 16/100 = 0.16                                                | 0.12                                                          |               | 45                                              |                                  |
|                      | 3                   | 10/100 = 0.10   | 0.04          | 0.06               |               | 21/100 = 0.21                                                | 0.17                                                          |               | 41                                              |                                  |
| 2                    | 1                   | 15/101 = 0.15   | 0.06          | 0.09               | 0.11          | 26/100 = 0.26                                                | 0.20                                                          | 0.21          | 41                                              | 53                               |
|                      | 2                   | 19/98 = 0.19    | 0.06          | 0.13               |               | 22/100 = 0.22                                                | 0.16                                                          |               | 63                                              |                                  |
|                      | 3                   | 14/100 = 0.14   | 0.02          | 0.12               |               | 30/100 = 0.30                                                | 0.28                                                          |               | 56                                              |                                  |
| 3                    | 1                   | 9/100 = 0.09    | 0.04          | 0.05               | 0.08          | 17/97 = 0.18                                                 | 0.14                                                          | 0.14          | 35                                              | 54                               |
|                      | 2                   | 12/100 = 0.12   | 0.04          | 0.08               |               | 16/96 = 0.16                                                 | 0.12                                                          |               | 57                                              |                                  |

| Biological Replicate | Technical Replicate | Background (BG) | ILVs/GUVs     | Raw Value (ILV-BG) | Average (AVG) | ILVs/GUVs                              | Raw Value (ILV-BG) | Average (AVG) | % Normalized Budding (Raw values/NEC AVG) * 100 | Biological Replicate Average (%) |
|----------------------|---------------------|-----------------|---------------|--------------------|---------------|----------------------------------------|--------------------|---------------|-------------------------------------------------|----------------------------------|
|                      | 3                   | 13/100 = 0.13   | 0.03          | 0.10               |               | 19/100 = 0.19                          | 0.13               |               | 71                                              |                                  |
|                      |                     |                 | NEC220        |                    |               | NEC220 + UL25Δ44 Q72A (1:0.1 NEC:UL25) |                    |               |                                                 |                                  |
| 1                    | 1                   | 10/100 = 0.10   | 17/100 = 0.17 | 0.07               | 0.09          | 14/100 = 0.14                          | 0.04               | 0.09          | 46                                              | 107                              |
|                      | 2                   | 6/100 = 0.06    | 15/100 = 0.15 | 0.09               |               | 17/90 = 0.19                           | 0.13               |               | 149                                             |                                  |
|                      | 3                   | 8/100 = 0.08    | 18/100 = 0.18 | 0.10               |               | 19/100 = 0.19                          | 0.11               |               | 127                                             |                                  |
| 2                    | 1                   | 3/96 = 0.03     | 23/99 = 0.23  | 0.20               | 0.15          | 21/100 = 0.21                          | 0.18               | 0.17          | 117                                             | 110                              |
|                      | 2                   | 7/95 = 0.07     | 22/100 = 0.22 | 0.15               |               | 28/100 = 0.28                          | 0.21               |               | 135                                             |                                  |
|                      | 3                   | 9/100 = 0.09    | 20/100 = 0.20 | 0.11               |               | 21/100 = 0.21                          | 0.12               |               | 79                                              |                                  |
| 3                    | 1                   | 6/100 = 0.06    | 19/100 = 0.19 | 0.13               | 0.14          | 17/100 = 0.17                          | 0.11               | 0.13          | 80                                              | 97                               |
|                      | 2                   | 7/100 = 0.07    | 19/100 = 0.19 | 0.12               |               | 14/96 = 0.15                           | 0.08               |               | 55                                              |                                  |
|                      | 3                   | 2/100 = 0.02    | 18/100 = 0.18 | 0.16               |               | 23/100 = 0.23                          | 0.21               |               | 154                                             |                                  |
|                      |                     |                 | NEC220        |                    |               | NEC220 + UL25Δ44 Q72A (1:0.3 NEC:UL25) |                    |               |                                                 |                                  |
| 1                    | 1                   | 3/96 = 0.03     | 23/99 = 0.23  | 0.20               | 0.15          | 27/97 = 0.28                           | 0.25               | 0.15          | 162                                             | 101                              |
|                      | 2                   | 7/95 = 0.07     | 22/100 = 0.22 | 0.15               |               | 17/100 = 0.17                          | 0.10               |               | 63                                              |                                  |
|                      | 3                   | 9/100 = 0.09    | 20/100 = 0.20 | 0.11               |               | 21/100 = 0.21                          | 0.11               |               | 79                                              |                                  |
| 2                    | 1                   | 6/100 = 0.06    | 19/100 = 0.19 | 0.13               | 0.14          | 16/100 = 0.16                          | 0.10               | 0.12          | 73                                              | 88                               |
|                      | 2                   | 7/100 = 0.07    | 19/100 = 0.19 | 0.12               |               | 16/100 = 0.16                          | 0.09               |               | 66                                              |                                  |
|                      | 3                   | 2/100 = 0.02    | 18/100 = 0.18 | 0.16               |               | 19/100 = 0.19                          | 0.17               |               | 124                                             |                                  |
| 3                    | 1                   | 1/100 = 0.01    | 17/90 = 0.19  | 0.18               | 0.14          | 21/100 = 0.21                          | 0.20               | 0.14          | 140                                             | 98                               |
|                      | 2                   | 6/100 = 0.06    | 18/100 = 0.18 | 0.14               |               | 15/100 = 0.15                          | 0.09               |               | 63                                              |                                  |
|                      | 3                   | 5/100 = 0.05    | 18/100 = 0.18 | 0.13               |               | 18/100 = 0.18                          | 0.13               |               | 91                                              |                                  |
|                      |                     |                 | NEC220        |                    |               | NEC220 + UL25Δ44 Q72A (1:0.6 NEC:UL25) |                    |               |                                                 |                                  |
| 1                    | 1                   | 8/100 = 0.08    | 19/100 = 0.19 | 0.11               | 0.11          | 16/100 = 0.16                          | 0.08               | 0.11          | 71                                              | 97                               |
|                      | 2                   | 9/100 = 0.09    | 18/100 = 0.18 | 0.09               |               | 21/100 = 0.21                          | 0.12               |               | 106                                             |                                  |
|                      | 3                   | 8/100 = 0.08    | 22/100 = 0.22 | 0.14               |               | 21/100 = 0.21                          | 0.13               |               | 115                                             |                                  |
| 2                    | 1                   | 6/100 = 0.06    | 19/100 = 0.19 | 0.13               | 0.14          | 18/100 = 0.18                          | 0.08               | 0.13          | 88                                              | 93                               |
|                      | 2                   | 7/100 = 0.07    | 19/100 = 0.19 | 0.12               |               | 16/94 = 0.17                           | 0.10               |               | 73                                              |                                  |
|                      | 3                   | 2/100 = 0.02    | 18/100 = 0.18 | 0.16               |               | 18/100 = 0.18                          | 0.16               |               | 117                                             |                                  |
| 3                    | 1                   | 1/100 = 0.01    | 17/90 = 0.19  | 0.18               | 0.14          | 20/100 = 0.20                          | 0.19               | 0.15          | 133                                             | 105                              |
|                      | 2                   | 6/100 = 0.06    | 18/100 = 0.18 | 0.14               |               | 15/90 = 0.17                           | 0.11               |               | 75                                              |                                  |
|                      | 3                   | 5/100 = 0.05    | 18/100 = 0.18 | 0.13               |               | 19/93 = 0.20                           | 0.15               |               | 108                                             |                                  |
|                      |                     |                 | NEC220        |                    |               | NEC220 + UL25Δ44 Q72A (1:1 NEC:UL25)   |                    |               |                                                 |                                  |
| 1                    | 1                   | 8/100 = 0.08    | 19/100 = 0.19 | 0.11               | 0.11          | 19/91 = 0.21                           | 0.13               | 0.13          | 113                                             | 112                              |
|                      | 2                   | 9/100 = 0.09    | 18/100 = 0.18 | 0.09               |               | 21/80 = 0.27                           | 0.18               |               | 152                                             |                                  |
|                      | 3                   | 8/100 = 0.08    | 22/100 = 0.22 | 0.14               |               | 16/100 = 0.16                          | 0.08               |               | 71                                              |                                  |
| 2                    | 1                   | 1/100 = 0.01    | 17/90 = 0.19  | 0.18               | 0.14          | 16/100 = 0.16                          | 0.15               | 0.15          | 105                                             | 105                              |

| Biological Replicate | Technical Replicate | Background (BG) | ILVs/GUVs     | Raw Value (ILV-BG) | Average (AVG) | ILVs/GUVs                             | Raw Value (ILV-BG) | Average (AVG) | % Normalized Budding (Raw values/NEC AVG) * 100 | Biological Replicate Average (%) |
|----------------------|---------------------|-----------------|---------------|--------------------|---------------|---------------------------------------|--------------------|---------------|-------------------------------------------------|----------------------------------|
|                      | 2                   | 6/100 = 0.06    | 18/100 = 0.18 | 0.14               |               | 22/100 = 0.22                         | 0.16               |               | 112                                             |                                  |
|                      | 3                   | 5/100 = 0.05    | 18/100 = 0.18 | 0.13               |               | 19/100 = 0.19                         | 0.14               |               | 98                                              |                                  |
|                      | 1                   | 3/90 = 0.03     | 10/81 = 0.12  | 0.09               |               | 11/97 = 0.11                          | 0.08               |               | 89                                              |                                  |
| 3                    | 2                   | 3/100 = 0.03    | 12/90 = 0.13  | 0.10               | 0.09          | 11/90 = 0.12                          | 0.09               | 0.09          | 102                                             | 100                              |
|                      | 3                   | 3/85 = 0.04     | 9/80 = 0.11   | 0.07               |               | 13/97 = 0.13                          | 0.09               |               | 109                                             |                                  |
|                      |                     |                 | NEC220        |                    |               | NEC220 + UL25Δ44 Q72A (1:10 NEC:UL25) |                    |               |                                                 |                                  |
| 1                    | 1                   | 3/100 = 0.03    | 13/94 = 0.14  | 0.11               | 0.07          | 4/100 = 0.04                          | 0.01               | 0.00          | 15                                              | 12                               |
|                      | 2                   | 4/100 = 0.04    | 8/90 = 0.09   | 0.05               |               | 4/100 = 0.04                          | 0.00               |               | 0                                               |                                  |
|                      | 3                   | 5/100 = 0.05    | 8/91 = 0.09   | 0.04               |               | 5/80 = 0.06                           | 0.01               |               | 19                                              |                                  |
| 2                    | 1                   | 5/100 = 0.05    | 12/100 = 0.12 | 0.07               | 0.10          | 5/100 = 0.05                          | 0.00               | 0.00          | 0                                               | 7                                |
|                      | 2                   | 6/100 = 0.06    | 16/105 = 0.15 | 0.09               |               | 6/97 = 0.06                           | 0.00               |               | 2                                               |                                  |
|                      | 3                   | 5/100 = 0.05    | 18/100 = 0.18 | 0.13               |               | 7/100 = 0.07                          | 0.02               |               | 21                                              |                                  |
| 3                    | 1                   | 3/87 = 0.03     | 17/85 = 0.20  | 0.17               | 0.14          | 3/85 = 0.03                           | 0.00               | 0.01          | 0                                               | 7                                |
|                      | 2                   | 2/96 = 0.02     | 15/94 = 0.16  | 0.14               |               | 5/101 = 0.05                          | 0.03               |               | 20                                              |                                  |
|                      | 3                   | 3/103 = 0.03    | 15/97 = 0.15  | 0.12               |               | 3/95 = 0.03                           | 0.00               |               | 2                                               |                                  |

## References

1. Gautier, R., Douguet, D., Antony, B. & Drin, G. HELIQUEST: a web server to screen sequences with specific alpha-helical properties. *Bioinformatics (Oxford, England)*. **24**, 2101-2102, doi:10.1093/bioinformatics/btn392 (2008).
2. Whitmore, L. & Wallace, B. A. Protein secondary structure analyses from circular dichroism spectroscopy: methods and reference databases. *Biopolymers*. **89**, 392-400, doi:10.1002/bip.20853 (2008).
3. van Stokkum, I. H., Spoelder, H. J., Bloemendal, M., van Grondelle, R. & Groen, F. C. Estimation of protein secondary structure and error analysis from circular dichroism spectra. *Anal. Biochem.* **191**, 110-118 (1990).
4. Sreerama, N. & Woody, R. W. Estimation of protein secondary structure from circular dichroism spectra: comparison of CONTIN, SELCON, and CDSSTR methods with an expanded reference set. *Anal. Biochem.* **287**, 252-260, doi:10.1006/abio.2000.4880 (2000).
